# Supplementary material for: Asexual Propagation of Greek Salvia officinalis L. Populations Selected for Ornamental Use
Source: MDPI journal article supplement (doi:10.3390/horticulturae9070847), 2023-07-24
Supplement: s1 [file s1]

## SUPPLEMENTARY DATA

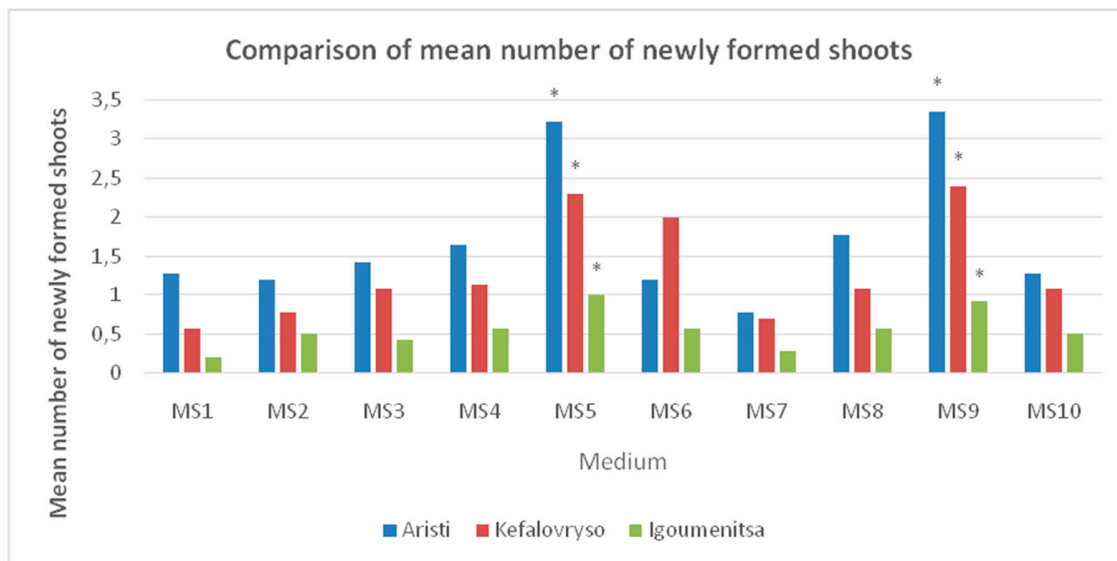

**Figure S1.** Effect of medium and population and their interactions on *in vitro* shoot regeneration. Mean values followed by asterisks (\*) are statistically different at significance level  $p \leq 0.05$ , according to Duncan's multiple range test.

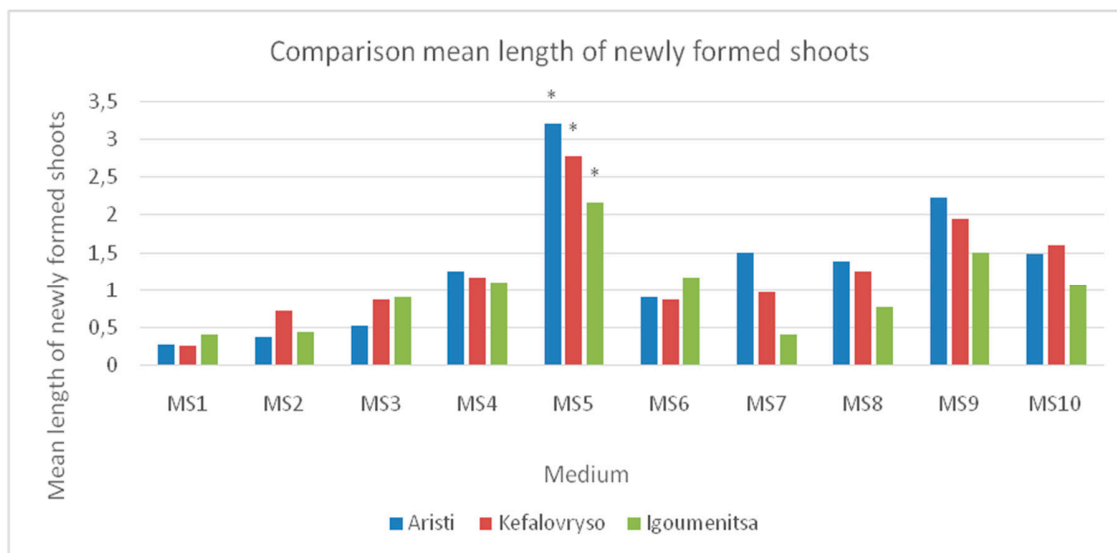

**Figure S2.** Effect of growth regulators on the length of newly formed shoots per population. Mean values followed by asterisks (\*) are statistically different at significance level  $p \leq 0.05$ , according to Duncan's multiple range test.

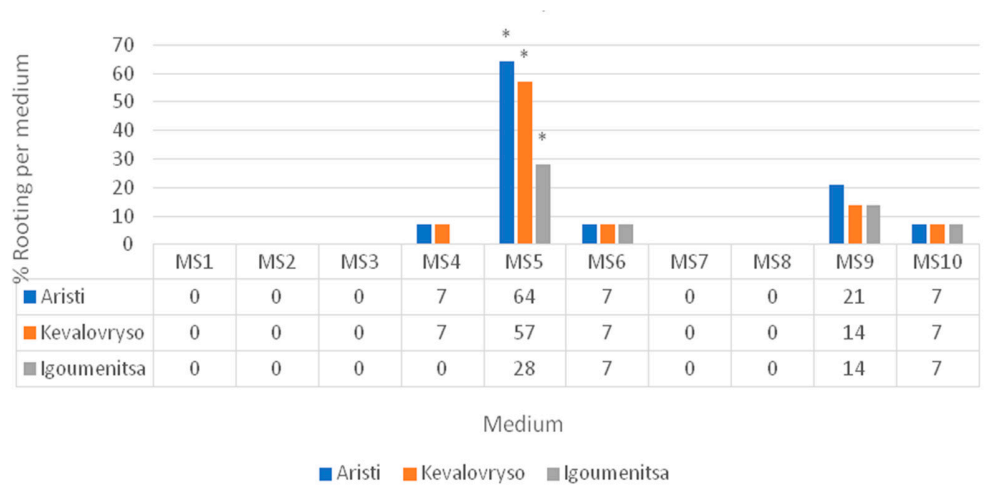

**Figure S3.** Spontaneous rooting (%) on multiplication media per population. Mean values followed by asterisks (\*) are statistically different at significance level  $p \leq 0.05$ , according to Duncan's multiple range test.

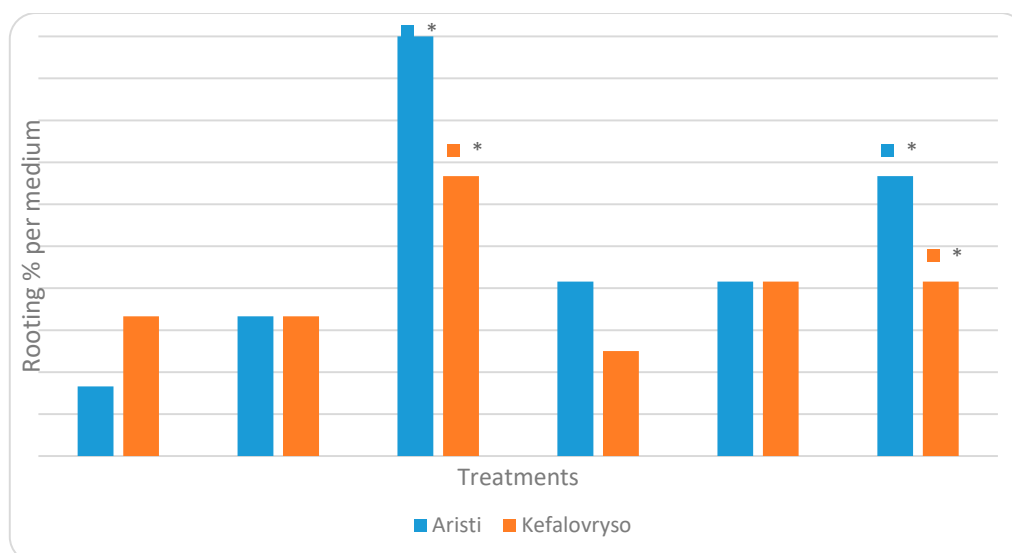

**Figure S4.** Comparison of the two populations Aristi and Kevalovryso in rooting ability in the case of combine effect of multiplication and rooting media.1(MS5+R1), 2 (MS5+R2), 3(MS5+R3), 4(MS9+R1), 5(MS9+R2), 6(MS9+R3).Values marked with asterisks (\*) are statistically significantly different at  $p \leq 0.05$ .

## NEWLY FORMED SHOOTS

**Table S1.** Substrate (medium) – Population interaction in terms of the number of newly formed shoots.

### Tests of Between-Subjects Effects

Dependent Variable: NewShoots

| Source              | Type III Sum of Squares | df  | Mean Square | F       | Sig. |
|---------------------|-------------------------|-----|-------------|---------|------|
| Corrected Model     | 257,298(a)              | 29  | 8,872       | 4,574   | ,000 |
| Intercept           | 607,202                 | 1   | 607,202     | 313,032 | ,000 |
| Population          | 96,705                  | 2   | 48,352      | 24,927  | ,000 |
| Medium              | 122,631                 | 9   | 13,626      | 7,024   | ,000 |
| Population * Medium | 37,962                  | 18  | 2,109       | 1,087   | ,363 |
| Error               | 756,500                 | 390 | 1,940       |         |      |
| Total               | 1621,000                | 420 |             |         |      |
| Corrected Total     | 1013,798                | 419 |             |         |      |

a R Squared = ,254 (Adjusted R Squared = ,198)

## SHOOTS LENGTH

**Table S2.** Substrate (medium) – population interaction in terms of shoot length.

### Tests of Between-Subjects Effects

Dependent Variable: Length

| Source              | Type III Sum of Squares | df  | Mean Square | F       | Sig. |
|---------------------|-------------------------|-----|-------------|---------|------|
| Corrected Model     | 211,074(a)              | 29  | 7,278       | 2,584   | ,000 |
| Intercept           | 597,264                 | 1   | 597,264     | 212,022 | ,000 |
| Medium              | 182,389                 | 9   | 20,265      | 7,194   | ,000 |
| Population          | 8,267                   | 2   | 4,133       | 1,467   | ,232 |
| Medium * Population | 20,419                  | 18  | 1,134       | ,403    | ,987 |
| Error               | 1098,625                | 390 | 2,817       |         |      |
| Total               | 1906,962                | 420 |             |         |      |
| Corrected Total     | 1309,699                | 419 |             |         |      |

a R Squared = ,161 (Adjusted R Squared = ,099)

## ROOTING

**Table S3.** Substrate – Variety Interaction in terms of rooting ability.

### Tests of Between-Subjects Effects

Dependent Variable: Rooting

| Source             | Type III Sum of Squares | df  | Mean Square | F      | Sig. |
|--------------------|-------------------------|-----|-------------|--------|------|
| Corrected Model    | 10,200 <sup>a</sup>     | 29  | ,352        | 6,039  | ,000 |
| Intercept          | 3,086                   | 1   | 3,086       | 52,981 | ,000 |
| Population         | ,186                    | 2   | ,093        | 1,594  | ,204 |
| Medium             | 9,105                   | 9   | 1,012       | 17,370 | ,000 |
| Population* Medium | ,910                    | 18  | ,051        | ,868   | ,619 |
| Error              | 22,714                  | 390 | ,058        |        |      |

|                 |        |     |  |  |  |
|-----------------|--------|-----|--|--|--|
| Total           | 36,000 | 420 |  |  |  |
| Corrected Total | 32,914 | 419 |  |  |  |

a. R Squared = ,310 (Adjusted R Squared = ,259)

## Rooting Medium

**Table S4.** Interaction of Growth regulators and Population (Aristi and Kefalovryso) in the case of combine effect of multiplication and rooting medium.

| Tests of Between-Subjects Effects     |                         |     |             |         |      |
|---------------------------------------|-------------------------|-----|-------------|---------|------|
| Dependent Variable: Rooting           |                         |     |             |         |      |
| Source                                | Type III Sum of Squares | df  | Mean Square | F       | Sig. |
| Corrected Model                       | 6,743 <sup>a</sup>      | 11  | ,613        | 2,798   | ,003 |
| Intercept                             | 29,340                  | 1   | 29,340      | 133,934 | ,000 |
| Population                            | ,340                    | 1   | ,340        | 1,553   | ,215 |
| Medium                                | ,062                    | 1   | ,062        | ,285    | ,594 |
| Growth regulators                     | 4,181                   | 2   | 2,090       | 9,542   | ,000 |
| Population* Medium                    | ,063                    | 1   | ,063        | ,285    | ,594 |
| Population* Growth regulators         | ,681                    | 2   | ,340        | 1,553   | ,215 |
| Medium* Growth regulators             | 1,125                   | 2   | ,563        | 2,568   | ,081 |
| Population*Medium * Growth regulators | ,292                    | 2   | ,146        | ,666    | ,516 |
| Error                                 | 28,917                  | 132 | ,219        |         |      |
| Total                                 | 65,000                  | 144 |             |         |      |
| Corrected Total                       | 35,660                  | 143 |             |         |      |

a. R Squared = ,189 (Adjusted R Squared = ,122)
